# Supplementary material for: Occupational risk factors associated with lower urinary tract symptoms among female workers: a systematic review
Source: HighWire-hosted journal article supplement (doi:10.1136/oemed-2022-108607), 2023-02-24
Supplement: oemed-2022-108607supp001_data_supplement.pdf [file oemed-2022-108607supp001_data_supplement.pdf]

**Supplementary File 1. Search strategy for PubMed, EMBASE, and Cochrane****PubMed search details : 276 results**

#1. ("Women, Working"[Mesh]) OR ("Women, Working"[TW] OR "Woman, Working"[TW] OR "Working Woman"[TW] OR "Working Women"[TW] OR "female worker"[TW] OR "female workers"[TW]) OR (((((((("Occupational Groups"[Mesh]) OR ("Occupational Groups"[TW] OR "Employees"[TW] OR "Personnel"[TW] OR "Workers"[TW] OR "Group, Occupational"[TW] OR "Groups, Occupational"[TW] OR "Occupational Group"[TW] OR "Employee"[TW] OR "Worker"[TW])) OR ("Workforce"[Mesh])) OR ("Workforce"[TW] OR "Workforces"[TW] OR "Human Resources"[TW] OR "Human Resource"[TW] OR "Womanpower"[TW] OR "Womanpowers"[TW] OR "Staffing"[TW] OR "Staffings"[TW] OR "Labor Supply"[TW] OR "Labor Supplies"[TW] OR "Supply, Labor"[TW] OR "Manpower"[TW] OR "Manpowers"[TW] OR "employed workforce"[TW])) OR ("Employment"[Mesh])) OR ("Employment"[TW] OR "Employment Termination"[TW] OR "Termination, Employment"[TW] OR "Labor Force"[TW] OR "Labor Forces"[TW] OR "Precarious Employment"[TW] OR "Employment, Precarious"[TW] OR "Marginal Employment"[TW] OR "Employment, Marginal"[TW] OR "Employment Insecurity"[TW] OR "Employment Insecurities"[TW] OR "Insecurity, Employment"[TW] OR "Employment Status"[TW] OR "Status, Employment"[TW] OR "Status, Occupational"[TW] OR "Occupational Status"[TW] OR "Underemployment"[TW])) OR ("Workplace"[Mesh])) OR ("Workplace"[TW] OR "Workplaces"[TW] OR "Work Location"[TW] OR "Location, Work"[TW] OR "Locations, Work"[TW] OR "Work Locations"[TW] OR "Work-Site"[TW] OR "Work Site"[TW] OR "Work-Sites"[TW] OR "Work Place"[TW] OR "Place, Work"[TW] OR "Places, Work"[TW] OR "Work Places"[TW] OR "Job Site"[TW] OR "Job Sites"[TW] OR "Site, Job"[TW] OR "Sites, Job"[TW] OR "Worksite"[TW] OR "Worksites"[TW])) AND (((("Female"[Mesh]) OR ("Female"[TW] OR "Females"[TW] OR "female worker"[TW] OR "Female Workers"[TW])) OR ("Women"[Mesh])) OR ("Women"[TW] OR "Girls"[TW] OR "Girl"[TW] OR "Woman"[TW] OR "Women's Groups"[TW] OR "Women Groups"[TW] OR "Women's Group"[TW]))): 384,607 results

#2. (((((((("Lower Urinary Tract Symptoms"[Mesh]) OR ("Lower Urinary Tract Symptoms"[TW] OR "Lower Urinary Tract Symptom"[TW] OR "urinary symptoms"[TW] OR "Urinary symptom"[TW])) OR ("Urinary Incontinence"[Mesh])) OR ("Urinary Incontinence"[TW] OR "Incontinence, Urinary"[TW])) OR ("Urinary Bladder, Overactive"[Mesh])) OR ("Urinary Bladder, Overactive"[TW] OR "Overactive Bladder"[TW] OR "Overactive Urinary Bladder"[TW] OR "Bladder, Overactive"[TW] OR "Overactive Detrusor"[TW] OR "Detrusor, Overactive"[TW] OR "Overactive Detrusor Function"[TW] OR "Detrusor Function, Overactive"[TW])) OR ("Pelvic Floor Disorders"[Mesh])) OR ("Pelvic Floor Disorders"[TW] OR "Disorder, Pelvic Floor"[TW] OR "Disorders, Pelvic Floor"[TW] OR "Pelvic Floor Disorder"[TW] OR "Pelvic Floor Diseases"[TW] OR "Disease, Pelvic Floor"[TW] OR "Diseases, Pelvic Floor"[TW] OR "Pelvic Floor Disease"[TW] OR "pelvic floor dysfunctions"[TW] OR "pelvic floor dysfunction"[TW]))): 62,314 results

#3. #1 AND #2: 846 results

#4. (((("Risk Factors"[Mesh]) OR ("Risk Factors"[TW] OR "Factor, Risk"[TW] OR "Risk Factor"[TW] OR "Health Correlates"[TW] OR "Correlates, Health"[TW] OR "Risk Scores"[TW] OR "Risk Score"[TW] OR "Score, Risk"[TW] OR "Risk Factor Scores"[TW] OR "Risk Factor Score"[TW] OR "Score, Risk Factor"[TW] OR "Population at Risk"[TW] OR "Populations at Risk"[TW] OR "occupational risk factor"[TW])) OR ("factor"[TW] OR "factors"[TW]

OR "occupational factor"[TW] OR "occupation-related"[TW] OR "work-related"[TW] OR "job-related"[TW])) OR ("Occupational Diseases"[Mesh])) OR ("Occupational Diseases"[TW] OR "Disease, Occupational"[TW] OR "Occupational Disease"[TW] OR "Occupational Illnesses"[TW] OR "Illness, Occupational"[TW] OR "Illnesses, Occupational"[TW] OR "Occupational Illness"[TW] OR "Diseases, Occupational"[TW]): 6,151,262 results

#5. #3 AND #4: 296 results

#6. #5 NOT ("animals"[MeSH] NOT "Humans"[MeSH]): 296 results

#7. #6 NOT ("Letter" [Publication Type] OR "Gray Literature"[Mesh]): 296 results

#8. #7 AND (english[Filter] OR korean[Filter]): 276 results

#### **EMBASE search details : 1,620 results**

#1. "female worker"/exp OR "Women, Working":ti,ab,kw,de OR "Woman, Working":ti,ab,kw,de OR "Working Woman":ti,ab,kw,de OR "Working Women":ti,ab,kw,de OR "female worker":ti,ab,kw,de OR "female workers":ti,ab,kw,de OR ("named groups by occupation"/exp OR "Occupational Groups":ti,ab,kw,de OR "Employees":ti,ab,kw,de OR "Personnel":ti,ab,kw,de OR "Workers":ti,ab,kw,de OR "Group, Occupational":ti,ab,kw,de OR "Groups, Occupational":ti,ab,kw,de OR "Occupational Group":ti,ab,kw,de OR "Employee":ti,ab,kw,de OR "Worker":ti,ab,kw,de OR "workforce"/exp

"Workforce":ti,ab,kw,de OR "Workforces":ti,ab,kw,de OR "Human Resources":ti,ab,kw,de OR "Human Resource":ti,ab,kw,de OR "Womanpower":ti,ab,kw,de OR "Womanpowers":ti,ab,kw,de OR "Staffing":ti,ab,kw,de OR "Staffings":ti,ab,kw,de OR "Labor Supply":ti,ab,kw,de OR "Labor Supplies":ti,ab,kw,de OR "Supply, Labor":ti,ab,kw,de OR "Manpower":ti,ab,kw,de OR "Manpowers":ti,ab,kw,de OR "employed workforce":ti,ab,kw,de OR "labor force":ti,ab,kw,de OR "employment"/exp OR "Employment":ti,ab,kw,de OR "Employment Termination":ti,ab,kw,de OR "Termination, Employment":ti,ab,kw,de OR "Labor Force":ti,ab,kw,de OR "Labor Forces":ti,ab,kw,de OR "Precarious Employment":ti,ab,kw,de OR "Employment, Precarious":ti,ab,kw,de OR "Marginal Employment":ti,ab,kw,de OR "Employment, Marginal":ti,ab,kw,de OR "Employment Insecurity":ti,ab,kw,de OR "Employment Insecurities":ti,ab,kw,de OR "Insecurity, Employment":ti,ab,kw,de OR "Employment Status":ti,ab,kw,de OR "Status, Employment":ti,ab,kw,de OR "Status, Occupational":ti,ab,kw,de OR "Occupational Status":ti,ab,kw,de OR "Underemployment":ti,ab,kw,de

"workplace"/exp OR "Workplace":ti,ab,kw,de OR "Workplaces":ti,ab,kw,de OR "Work Location":ti,ab,kw,de OR "Location, Work":ti,ab,kw,de OR "Locations, Work":ti,ab,kw,de OR "Work Locations":ti,ab,kw,de OR "Work-Site":ti,ab,kw,de OR "Work Site":ti,ab,kw,de OR "Work-Sites":ti,ab,kw,de OR "Work Place":ti,ab,kw,de OR "Place, Work":ti,ab,kw,de OR "Places, Work":ti,ab,kw,de OR "Work Places":ti,ab,kw,de OR "Job Site":ti,ab,kw,de OR "Job Sites":ti,ab,kw,de OR "Site, Job":ti,ab,kw,de OR "Sites, Job":ti,ab,kw,de OR "Worksite":ti,ab,kw,de OR "Worksites":ti,ab,kw,de AND ("female"/exp OR "Female":ti,ab,kw,de OR "Females":ti,ab,kw,de OR "female worker":ti,ab,kw,de OR "Female Workers":ti,ab,kw,de OR "Women":ti,ab,kw,de OR

"Girls":ti,ab,kw,de OR "Girl":ti,ab,kw,de OR "Woman":ti,ab,kw,de OR "Women^s Groups":ti,ab,kw,de OR "Women Groups":ti,ab,kw,de OR "Women^s Group":ti,ab,kw,de)): 970,131 results

#2. "lower urinary tract symptom"/exp OR "Lower Urinary Tract Symptoms":ti,ab,kw,de OR "Lower Urinary Tract Symptom":ti,ab,kw,de OR "urinary symptoms":ti,ab,kw,de OR "Urinary symptom":ti,ab,kw,de OR "urine incontinence"/exp OR "Urinary Incontinence":ti,ab,kw,de OR "Incontinence, Urinary":ti,ab,kw,de OR "overactive bladder"/exp OR "Urinary Bladder, Overactive":ti,ab,kw,de OR "Overactive Bladder":ti,ab,kw,de OR "Overactive Urinary Bladder":ti,ab,kw,de OR "Bladder, Overactive":ti,ab,kw,de OR "Overactive Detrusor":ti,ab,kw,de OR "Detrusor, Overactive":ti,ab,kw,de OR "Overactive Detrusor Function":ti,ab,kw,de OR "Detrusor Function, Overactive":ti,ab,kw,de OR "pelvic floor disorder"/exp OR "Pelvic Floor Disorders":ti,ab,kw,de OR "Disorder, Pelvic Floor":ti,ab,kw,de OR "Disorders, Pelvic Floor":ti,ab,kw,de OR "Pelvic Floor Disorder":ti,ab,kw,de OR "Pelvic Floor Diseases":ti,ab,kw,de OR "Disease, Pelvic Floor":ti,ab,kw,de OR "Diseases, Pelvic Floor":ti,ab,kw,de OR "Pelvic Floor Disease":ti,ab,kw,de OR "pelvic floor dysfunctions":ti,ab,kw,de OR "pelvic floor dysfunction":ti,ab,kw,de: 122,645 results

#3. #1 AND #2: 7,057 results

#4. "risk factor"/exp OR "Risk Factors":ti,ab,kw,de OR "Factor, Risk":ti,ab,kw,de OR "Risk Factor":ti,ab,kw,de OR "Health Correlates":ti,ab,kw,de OR "Correlates, Health":ti,ab,kw,de OR "Risk Scores":ti,ab,kw,de OR "Risk Score":ti,ab,kw,de OR "Score, Risk":ti,ab,kw,de OR "Risk Factor Scores":ti,ab,kw,de OR "Risk Factor Score":ti,ab,kw,de OR "Score, Risk Factor":ti,ab,kw,de OR "Population at Risk":ti,ab,kw,de OR "Populations at Risk":ti,ab,kw,de OR "occupational risk factor":ti,ab,kw,de OR "factor":ti,ab,kw,de OR "factors":ti,ab,kw,de OR "occupational factor":ti,ab,kw,de OR "occupation-related":ti,ab,kw,de OR "work-related":ti,ab,kw,de OR "job-related":ti,ab,kw,de OR "occupational disease"/exp OR "Occupational Diseases":ti,ab,kw,de OR "Disease, Occupational":ti,ab,kw,de OR "Occupational Disease":ti,ab,kw,de OR "Occupational Illnesses":ti,ab,kw,de OR "Illness, Occupational":ti,ab,kw,de OR "Illnesses, Occupational":ti,ab,kw,de OR "Occupational Illnesse":ti,ab,kw,de OR "Diseases, Occupational":ti,ab,kw,de: 6,441,367 results

#5. #3 AND #4: 1,668 results

#6. #5 NOT ("animals"[MeSH] NOT "Humans"[MeSH]): 1,668 results

#7. #6 NOT ("Letter" [Publication Type] OR "Gray Literature"[Mesh]): 1,664 results

#8. #7 AND (english[Filter] OR korean[Filter]): 1,620 results

### **Cochrane database : 17 results**

#1. [mh "Women, Working"] OR "Women, Working":ti,ab,kw OR "Woman, Working":ti,ab,kw OR "Working Woman":ti,ab,kw OR "Working Women":ti,ab,kw OR "female worker":ti,ab,kw OR "female workers":ti,ab,kw OR (([mh "Occupational Groups"] OR "Occupational Groups":ti,ab,kw OR

"Employees":ti,ab,kw OR "Personnel":ti,ab,kw OR "Workers":ti,ab,kw OR "Group, Occupational":ti,ab,kw OR "Groups, Occupational":ti,ab,kw OR "Occupational Group":ti,ab,kw OR "Employee":ti,ab,kw OR "Worker":ti,ab,kw OR [mh "Workforce"] OR "Workforce":ti,ab,kw OR "Workforces":ti,ab,kw OR "Human Resources":ti,ab,kw OR "Human Resource":ti,ab,kw OR "Womanpower":ti,ab,kw OR "Womanpowers":ti,ab,kw OR "Staffing":ti,ab,kw OR "Staffings":ti,ab,kw OR "Labor Supply":ti,ab,kw OR "Labor Supplies":ti,ab,kw OR "Supply, Labor":ti,ab,kw OR "Manpower":ti,ab,kw OR "Manpowers":ti,ab,kw OR "employed workforce":ti,ab,kw OR [mh "Employment"] OR "Employment":ti,ab,kw OR "Employment Termination":ti,ab,kw OR "Termination, Employment":ti,ab,kw OR "Labor Force":ti,ab,kw OR "Labor Forces":ti,ab,kw OR "Precarious Employment":ti,ab,kw OR "Employment, Precarious":ti,ab,kw OR "Marginal Employment":ti,ab,kw OR "Employment, Marginal":ti,ab,kw OR "Employment Insecurity":ti,ab,kw OR "Employment Insecurities":ti,ab,kw OR "Insecurity, Employment":ti,ab,kw OR "Employment Status":ti,ab,kw OR "Status, Employment":ti,ab,kw OR "Status, Occupational":ti,ab,kw OR "Occupational Status":ti,ab,kw OR "Underemployment":ti,ab,kw OR [mh "Workplace"] OR "Workplace":ti,ab,kw OR "Workplaces":ti,ab,kw OR "Work Location":ti,ab,kw OR "Location, Work":ti,ab,kw OR "Locations, Work":ti,ab,kw OR "Work Locations":ti,ab,kw OR "Work-Site":ti,ab,kw OR "Work Site":ti,ab,kw OR "Work-Sites":ti,ab,kw OR "Work Place":ti,ab,kw OR "Place, Work":ti,ab,kw OR "Places, Work":ti,ab,kw OR "Work Places":ti,ab,kw OR "Job Site":ti,ab,kw OR "Job Sites":ti,ab,kw OR "Site, Job":ti,ab,kw OR "Sites, Job":ti,ab,kw OR "Worksite":ti,ab,kw OR "Worksites":ti,ab,kw) AND ([mh "Female"] OR "Female":ti,ab,kw OR "Females":ti,ab,kw OR "female worker":ti,ab,kw OR "Female Workers":ti,ab,kw OR [mh "Women"] OR "Women":ti,ab,kw OR "Girls":ti,ab,kw OR "Girl":ti,ab,kw OR "Woman":ti,ab,kw OR "Women's Groups":ti,ab,kw OR "Women Groups":ti,ab,kw OR "Women's Group":ti,ab,kw)): 25,426 results.

#2. [mh "Lower Urinary Tract Symptoms"] OR "Lower Urinary Tract Symptoms":ti,ab,kw OR "Lower Urinary Tract Symptom":ti,ab,kw OR "urinary symptoms":ti,ab,kw OR "Urinary symptom":ti,ab,kw OR [mh "Urinary Incontinence"] OR "Urinary Incontinence":ti,ab,kw OR "Incontinence, Urinary":ti,ab,kw OR [mh "Urinary Bladder, Overactive"] OR "Urinary Bladder, Overactive":ti,ab,kw OR "Overactive Bladder":ti,ab,kw OR "Overactive Urinary Bladder":ti,ab,kw OR "Bladder, Overactive":ti,ab,kw OR "Overactive Detrusor":ti,ab,kw OR "Detrusor, Overactive":ti,ab,kw OR "Overactive Detrusor Function":ti,ab,kw OR "Detrusor Function, Overactive":ti,ab,kw OR [mh "Pelvic Floor Disorders"] OR "Pelvic Floor Disorders":ti,ab,kw OR "Disorder, Pelvic Floor":ti,ab,kw OR "Disorders, Pelvic Floor":ti,ab,kw OR "Pelvic Floor Disorder":ti,ab,kw OR "Pelvic Floor Diseases":ti,ab,kw OR "Disease, Pelvic Floor":ti,ab,kw OR "Diseases, Pelvic Floor":ti,ab,kw OR "Pelvic Floor Disease":ti,ab,kw OR "pelvic floor dysfunctions":ti,ab,kw OR "pelvic floor dysfunction":ti,ab,kw: 11,055 results

#3. #1 AND #2: 106 results

#4. [mh "Risk Factors"] OR "Risk Factors":ti,ab,kw OR "Factor, Risk":ti,ab,kw OR "Risk Factor":ti,ab,kw OR "Health Correlates":ti,ab,kw OR "Correlates, Health":ti,ab,kw OR "Risk Scores":ti,ab,kw OR "Risk Score":ti,ab,kw OR "Score, Risk":ti,ab,kw OR "Risk Factor Scores":ti,ab,kw OR "Risk Factor Score":ti,ab,kw OR "Score, Risk Factor":ti,ab,kw OR "Population at Risk":ti,ab,kw OR "Populations at Risk":ti,ab,kw OR "occupational risk factor":ti,ab,kw OR "factor":ti,ab,kw OR "factors":ti,ab,kw OR "occupational factor":ti,ab,kw OR "occupation-related":ti,ab,kw OR "work-related":ti,ab,kw OR "job-related":ti,ab,kw OR [mh "Occupational Diseases"] OR "Occupational Diseases":ti,ab,kw OR "Disease, Occupational":ti,ab,kw OR "Occupational

Disease":ti,ab,kw OR "Occupational Illnesses":ti,ab,kw OR "Illnesse, Occupational":ti,ab,kw OR "Illnesses, Occupational":ti,ab,kw OR "Occupational Illnesse":ti,ab,kw OR "Diseases, Occupational":ti,ab,kw: 272,379 results

#5. #3 AND #4: 1,668 results

#6. #5 NOT ("animals"[MeSH] NOT "Humans"[MeSH]): 17 results

#7. #6 NOT ("Letter" [Publication Type] OR "Gray Literature"[Mesh]): 17 results
