# Supplementary material for: Occupational risk factors associated with lower urinary tract symptoms among female workers: a systematic review
Source: HighWire-hosted journal article supplement (doi:10.1136/oemed-2022-108607), 2023-02-24
Supplement: oemed-2022-108607supp002_data_supplement.pdf [file oemed-2022-108607supp002_data_supplement.pdf]

**Supplementary Table 1.** Newcastle-Ottawa Quality Assessment Scale of studies included in this review

| First author.            | Year | S1 | S2 | S3 | S4 | C | O1 | O2 | Total score |
|--------------------------|------|----|----|----|----|---|----|----|-------------|
| Cross-sectional studies* |      |    |    |    |    |   |    |    |             |
| J. R. Fischer            | 1999 | 1  | 0  | 0  | 1  | 1 | 1  | 1  | 5           |
| W. J. Zhang              | 2005 | 1  | 1  | 0  | 1  | 1 | 1  | 1  | 6           |
| Y. M. Liao               | 2008 | 1  | 1  | 0  | 1  | 2 | 1  | 1  | 7           |
| K. A. Avasarala          | 2008 | 0  | 0  | 1  | 1  | 1 | 1  | 1  | 5           |
| Y. Wang                  | 2011 | 1  | 1  | 0  | 1  | 2 | 1  | 1  | 7           |
| C. Zhang;                | 2013 | 1  | 1  | 0  | 2  | 1 | 1  | 1  | 7           |
| M. O. Amaral             | 2015 | 0  | 0  | 1  | 1  | 2 | 1  | 1  | 6           |
| Y. Kaya                  | 2016 | 0  | 0  | 1  | 1  | 1 | 1  | 1  | 5           |
| Y. Kim                   | 2017 | 1  | 1  | 0  | 1  | 1 | 1  | 1  | 6           |
| Z. Wei-Wei               | 2017 | 0  | 0  | 1  | 1  | 1 | 1  | 1  | 5           |
| M. H. Palmer             | 2018 | 0  | 0  | 0  | 2  | 2 | 1  | 1  | 6           |
| W. S. Reynolds           | 2019 | 1  | 1  | 0  | 1  | 1 | 1  | 1  | 6           |
| D. Xu                    | 2019 | 1  | 0  | 0  | 2  | 2 | 1  | 1  | 7           |
| A. Salgado-Maldonado     | 2020 | 1  | 1  | 1  | 1  | 1 | 1  | 1  | 7           |
| K. L. Skaug              | 2021 | 1  | 0  | 0  | 1  | 2 | 1  | 1  | 6           |
| F. B. Nerbass            | 2021 | 1  | 0  | 0  | 1  | 1 | 1  | 1  | 5           |
| M. Kim                   | 2022 | 1  | 1  | 1  | 2  | 2 | 1  | 1  | 9           |
| H. Alamdari              | 2022 | 1  | 1  | 1  | 0  | 0 | 1  | 1  | 5           |

S: selection, C: comparability, O: outcome

\* Modified version of the Newcastle-Ottawa scale was used in the cross-sectional studies

This scale has been adapted from the Newcastle-Ottawa Quality Assessment Scale for cohort studies. The adapted Newcastle-Ottawa scale created for cross-sectional studies by PA Modesti et al<sup>1</sup>. and Herzog et al<sup>2</sup>

#### NEWCASTLE - OTTAWA QUALITY ASSESSMENT SCALE (adapted for cross sectional studies)

##### **Selection: (Maximum 5 stars)**

- 1) Representativeness of the sample:
  - a) Truly representative of the average in the target population. \* (all subjects or random sampling)
  - b) Somewhat representative of the average in the target population. \* (non-random sampling)
  - c) Selected group of users.
  - d) No description of the sampling strategy.
- 2) Sample size:
  - a) Justified and satisfactory. \*
  - b) Not justified.
- 3) Non-respondents:
  - a) Comparability between respondents and non-respondents characteristics is established, and the response rate is satisfactory. \*
  - b) The response rate is unsatisfactory, or the comparability between respondents and non-respondents is unsatisfactory.
  - c) No description of the response rate or the characteristics of the responders and the non-responders.
- 4) Ascertainment of the exposure (risk factor):
  - a) Validated measurement tool. \*\*
  - b) Non-validated measurement tool, but the tool is available or described.\*
  - c) No description of the measurement tool.

##### **Comparability: (Maximum 2 stars)**

- 1) The subjects in different outcome groups are comparable, based on the study design or analysis. Confounding factors are controlled.
  - a) The study controls for the most important factors (age, BMI and obstetric history). \*
  - b) The study control for any additional factor (e.g. race/ethnicity, socioeconomic status, smoking status, drinking, hobbies, history of illness, sexual relationships) \*

##### **Outcome: (Maximum 3 stars)**

- 1) Assessment of the outcome:
  - a) Independent blind assessment. \*\*
  - b) Record linkage. \*\*
  - c) Self report. \*
  - d) No description.
- 2) Statistical test:

- a) The statistical test used to analyze the data is clearly described and appropriate, and the measurement of the association is presented, including confidence intervals and the probability level (p value). \*
- b) The statistical test is not appropriate, not described or incomplete.

### **Scores for cross-sectional studies**

- Very good studies: 9-10 points
- Good studies: 7-8 points
- Satisfactory studies: 5-6 points
- Unsatisfactory studies: 0 to 4 points

### **References**

1. Modesti PA, Reboldi G, Cappuccio FP, Agyemang C, Remuzzi G, Rapi S, Perruolo E, Parati G; ESH Working Group on CV Risk in Low Resource Settings. Panethnic Differences in Blood Pressure in Europe: A Systematic Review and Meta-Analysis. *PLoS One*. 2016 Jan 25;11(1):e0147601. doi: 10.1371/journal.pone.0147601. PMID: 26808317; PMCID: PMC4725677.
2. Herzog R, Alvarez-Pasquin MJ, Diaz C, Del Barrio JL, Estrada JM, Gil A. Are healthcare workers' intentions to vaccinate related to their knowledge, beliefs and attitudes? A systematic review. *BMC Public Health*. 2013;13:154.
