# Supplementary material for: Occupational risk factors associated with lower urinary tract symptoms among female workers: a systematic review
Source: HighWire-hosted journal article supplement (doi:10.1136/oemed-2022-108607), 2023-02-24
Supplement: oemed-2022-108607supp003_data_supplement.pdf [file oemed-2022-108607supp003_data_supplement.pdf]

**Supplementary Table 2.** Assessment of exposure (occupational risk factors) and outcome (LUTS) variables among selected studies

| <b>Occupational risk factors</b>              | <b>Assessment</b>                                                                                                                                                                                                                                                                                                                                                                                                                             | <b>Citation number of study</b> |
|-----------------------------------------------|-----------------------------------------------------------------------------------------------------------------------------------------------------------------------------------------------------------------------------------------------------------------------------------------------------------------------------------------------------------------------------------------------------------------------------------------------|---------------------------------|
| Physical demand and activity at the workplace | Hard work defined as work that requires several hours of standing, moving heavy objects (greater than 20 kg), going up and down the stairs, or spending more than 8 hours performing job-related tasks daily                                                                                                                                                                                                                                  | 23                              |
|                                               | Manual work compared with mental work                                                                                                                                                                                                                                                                                                                                                                                                         | 8                               |
|                                               | Frequent straining to lift heavy objects at work                                                                                                                                                                                                                                                                                                                                                                                              | 9                               |
|                                               | Labor workers compared with the unemployed                                                                                                                                                                                                                                                                                                                                                                                                    | 7                               |
|                                               | Physical activity levels at work measured by GPAQ<br>- Vigorous activity was defined as activities that caused large increases in breathing or heart rate (such as running or carrying a heavy load or digging) for at least 10 minutes continuously.<br>- Moderate activity was defined as activities that caused small increases in breathing or heart rate (such as cycling or carrying light loads) for at least 10 minutes continuously. | 15                              |
|                                               | Sitting hours per day;<br>Frequently carrying more than 3 kg in weight                                                                                                                                                                                                                                                                                                                                                                        | 10                              |
|                                               | Prolonged sitting was defined as continuous sitting for more than 6 hours                                                                                                                                                                                                                                                                                                                                                                     | 20                              |
| Occupational stress                           | Assessed by Nurse job stress scale<br>- Occupational stressor include heavy workloads, low salary, lack of an opportunity for promotion, fear of making a mistake in treating a patient, low social status, lack of an opportunity for continuing education, frequent night shifts, not enough staff to adequately cover the unit, too many non-nursing tasks required, and not enough time to provide emotional support to a patient         | 18                              |
|                                               | Assessed by OSI-R<br>- Occupational stress include role overload, role insufficiency, role ambiguity, role boundary, responsibility, and physical environment<br>- Psychological strain include vocational strain, psychological strain, interpersonal strain, and physical strain                                                                                                                                                            | 19                              |
| Restriction on restroom at work               | Job control is conceptualized as high when the teacher has the opportunity to toilet whenever participant chooses.<br>- Participants were asked ‘‘How much control do you have over your job? By control we mean how much freedom you have to toilet when you wish.’’                                                                                                                                                                         | 9                               |
|                                               | Among toileting behaviors assessed by TB-WEB<br>- Delay empty my bladder when I am busy<br>- Wait too long (strong need to urinate or actual leakage) when I have to empty my bladder at work<br>- Limit use of the bathroom at work                                                                                                                                                                                                          | 17                              |
|                                               | Nurses were assigned in the dialysis rooms, and the toilets and water supplies were available outside of the dialysis                                                                                                                                                                                                                                                                                                                         | 24                              |

|                                 |                                                                                                        |                                 |
|---------------------------------|--------------------------------------------------------------------------------------------------------|---------------------------------|
|                                 | rooms <sup>24</sup>                                                                                    |                                 |
| Shift work                      | Working non-standard shifts                                                                            | 25                              |
| Other occupational environments | Working situation                                                                                      |                                 |
|                                 | - Unclean and uncomfortable workplace                                                                  |                                 |
|                                 | - Dangerous job and probability of accidents                                                           | 21                              |
|                                 | - Feeling pressed for time                                                                             |                                 |
|                                 | - Awkward position for long periods <sup>21</sup>                                                      |                                 |
|                                 | Too busy to drink <sup>22</sup>                                                                        | 22                              |
| <b>Outcome variables</b>        | <b>Assessment</b>                                                                                      | <b>Citation number of study</b> |
| LUTS                            | Assessed by BFLUTS questionnaire                                                                       | 7                               |
|                                 | Defined based on the standardization report proposed by the International Continence Society           | 9                               |
|                                 | Assessed by ICIQ-FLUTS questionnaire                                                                   | 17, 25                          |
|                                 | Adapted from Taiwan Teacher Bladder Survey                                                             | 22                              |
|                                 | Non-validated questionnaire                                                                            | 20                              |
| UI                              | Assessed by ICIQ-SF questionnaire                                                                      | 8, 10                           |
|                                 | Defined e as involuntary urine loss in the last month and uses the Sandvik index to determine severity | 23                              |
|                                 | Non-validated questionnaire                                                                            | 14                              |
| OAB                             | Assessed by OABSS questionnaire                                                                        | 8, 18                           |
|                                 | Assessed by ICIQ-OAB questionnaire                                                                     | 16                              |
|                                 | Defined based on the standardization report proposed by the International Continence Society           | 19                              |

BFLUTS Questionnaire: Bristol Female Lower Urinary Tract Symptoms Questionnaire  
 ICIQ-FLUTS: International Consultation on Incontinence Questionnaire-Female LUTS  
 ICIQ-OAB: International Consultation on Incontinence Questionnaire-Overactive Bladder  
 ICIQ-SF: International Consultation on Incontinence Questionnaire-Short Form  
 LUT: lower urinary tract  
 LUTS: lower urinary tract symptoms  
 OAB: Overactive Bladder  
 OABSS: Overactive Bladder Symptom Score  
 OSI-R: Occupational Stress Inventory-Revised  
 TB-WEB: Toileting Behaviors-WEB scale  
 UI: urinary incontinence
